# Supplementary material for: Photosynthetic Toxicity of Enrofloxacin on Scenedesmus obliquus in an Aquatic Environment
Source: MDPI journal article supplement (doi:10.3390/ijerph19095545), 2022-05-03
Supplement: s1 [file s1]

---

# **Toxicity effect of typical antibiotics on *Scenedesmus obliquus* in aquatic environment**

**Zhiheng Li<sup>a, b</sup>, Xianghong Zhang<sup>a, b</sup>, Hong Fang<sup>a, b</sup>, Xinmi Dai<sup>a, b</sup>, Huijun Liu<sup>a, b\*</sup>**

<sup>a</sup> School of Environmental Science and Engineering, Zhejiang Gongshang University, Hangzhou, Zhejiang 310018, China.

<sup>b</sup> Instrumental analysis center of Zhejiang Gongshang University, Hangzhou 310018, Zhejiang Province, China.

\*Corresponding author.

Tel.: +34 934024494; fax: +34 934024495.

E-mail address: [lhj@zjgsu.edu.cn](mailto:lhj@zjgsu.edu.cn) (H.J. Liu)

---

### Caption

**Table. S1 Artificial culture medium.**

**Table. S2 The value of EC<sub>50</sub> in *S. obliquus* in different culture times.**

**Table. S3 The chlorophyll fluorescence parameters of *S. obliquus* treated with enrofloxacin.**

**Table S1 Artificial culture medium**

| Compounds                                        | Concentration |
|--------------------------------------------------|---------------|
| NaHCO <sub>3</sub>                               | 0.10 g/L      |
| MgSO <sub>4</sub> •H <sub>2</sub> O              | 0.08 g/L      |
| ZnSO <sub>4</sub> •7H <sub>2</sub> O             | 0.03 g/L      |
| (NH <sub>4</sub> ) <sub>2</sub> •SO <sub>4</sub> | 0.20 g/L      |
| KCl                                              | 0.025 g/L     |
| FeCl <sub>3</sub> , 1% (W/W)                     | 150 µL        |
| Soil extract                                     | 500 µL        |

---

**Table S2 The value of EC<sub>50</sub> in *S. obliquus* in different culture times**

| <b>Time (h)</b> | <b>EC<sub>50</sub>(μg/L)</b> | <b>A<sub>1</sub></b> | <b>A<sub>2</sub></b> | <b><i>p</i></b> | <b>R<sup>2</sup></b> |
|-----------------|------------------------------|----------------------|----------------------|-----------------|----------------------|
| 24              | 119.74                       | -1.8766              | 111.5462             | 1.0945          | 0.99812              |
| 48              | 53.09                        | 6.2716               | 95.1479              | 1.6268          | 0.09975              |
| 72              | 64.37                        | -2.4995              | 64.3713              | 2.2870          | 0.9959               |
| 96              | 52.64                        | 1.0488               | 52.6140              | 1.6675          | 0.9991               |

**Table S3 The chlorophyll fluorescence parameters of *S. obliquus* treated with enrofloxacin**

| Time<br>(h) | Dosage<br>( $\mu\text{g/L}$ ) | $F_0$             | $F_m$             | $F_v/F_m$         | $F_v/F_0$         |
|-------------|-------------------------------|-------------------|-------------------|-------------------|-------------------|
| 48          | 0                             | 0.083 $\pm$ 0.002 | 0.198 $\pm$ 0.005 | 0.581 $\pm$ 0.004 | 1.389 $\pm$ 0.020 |
|             | 10                            | 0.118 $\pm$ 0.001 | 0.208 $\pm$ 0.002 | 0.432 $\pm$ 0.002 | 0.760 $\pm$ 0.003 |
|             | 50                            | 0.156 $\pm$ 0.003 | 0.263 $\pm$ 0.004 | 0.480 $\pm$ 0.002 | 0.686 $\pm$ 0.006 |
|             | 80                            | 0.188 $\pm$ 0.007 | 0.304 $\pm$ 0.011 | 0.407 $\pm$ 0.002 | 0.615 $\pm$ 0.000 |
|             | 120                           | 0.267 $\pm$ 0.010 | 0.362 $\pm$ 0.013 | 0.381 $\pm$ 0.001 | 0.355 $\pm$ 0.003 |
|             | 180                           | 0.345 $\pm$ 0.003 | 0.407 $\pm$ 0.003 | 0.261 $\pm$ 0.002 | 0.182 $\pm$ 0.003 |
| 96          | 0                             | 0.088 $\pm$ 0.001 | 0.232 $\pm$ 0.005 | 0.613 $\pm$ 0.002 | 1.619 $\pm$ 0.069 |
|             | 10                            | 0.143 $\pm$ 0.001 | 0.305 $\pm$ 0.001 | 0.536 $\pm$ 0.001 | 1.143 $\pm$ 0.016 |
|             | 50                            | 0.208 $\pm$ 0.003 | 0.318 $\pm$ 0.008 | 0.379 $\pm$ 0.002 | 0.595 $\pm$ 0.017 |
|             | 80                            | 0.236 $\pm$ 0.001 | 0.349 $\pm$ 0.000 | 0.365 $\pm$ 0.002 | 0.552 $\pm$ 0.023 |
|             | 120                           | 0.317 $\pm$ 0.002 | 0.375 $\pm$ 0.003 | 0.107 $\pm$ 0.002 | 0.100 $\pm$ 0.005 |
|             | 180                           | 0.371 $\pm$ 0.006 | 0.385 $\pm$ 0.004 | 0.000 $\pm$ 0.000 | 0.033 $\pm$ 0.005 |
